# Supplementary material for: Osteoclast-associated receptor blockade prevents articular cartilage destruction via chondrocyte apoptosis regulation
Source: PubMed Central journal article supplement (PMC7455568; doi:10.1038/s41467-020-18208-y), 2020-08-28
Supplement: 41467_2020_18208_MOESM1_ESM.pdf [file 41467_2020_18208_MOESM1_ESM.pdf]

Supplementary Information

**Osteoclast-associated receptor blockade prevents articular cartilage destruction via chondrocyte apoptosis regulation**

Park et al.

This file contains:

Supplementary Figures 1-5

Supplementary Tables 1-2

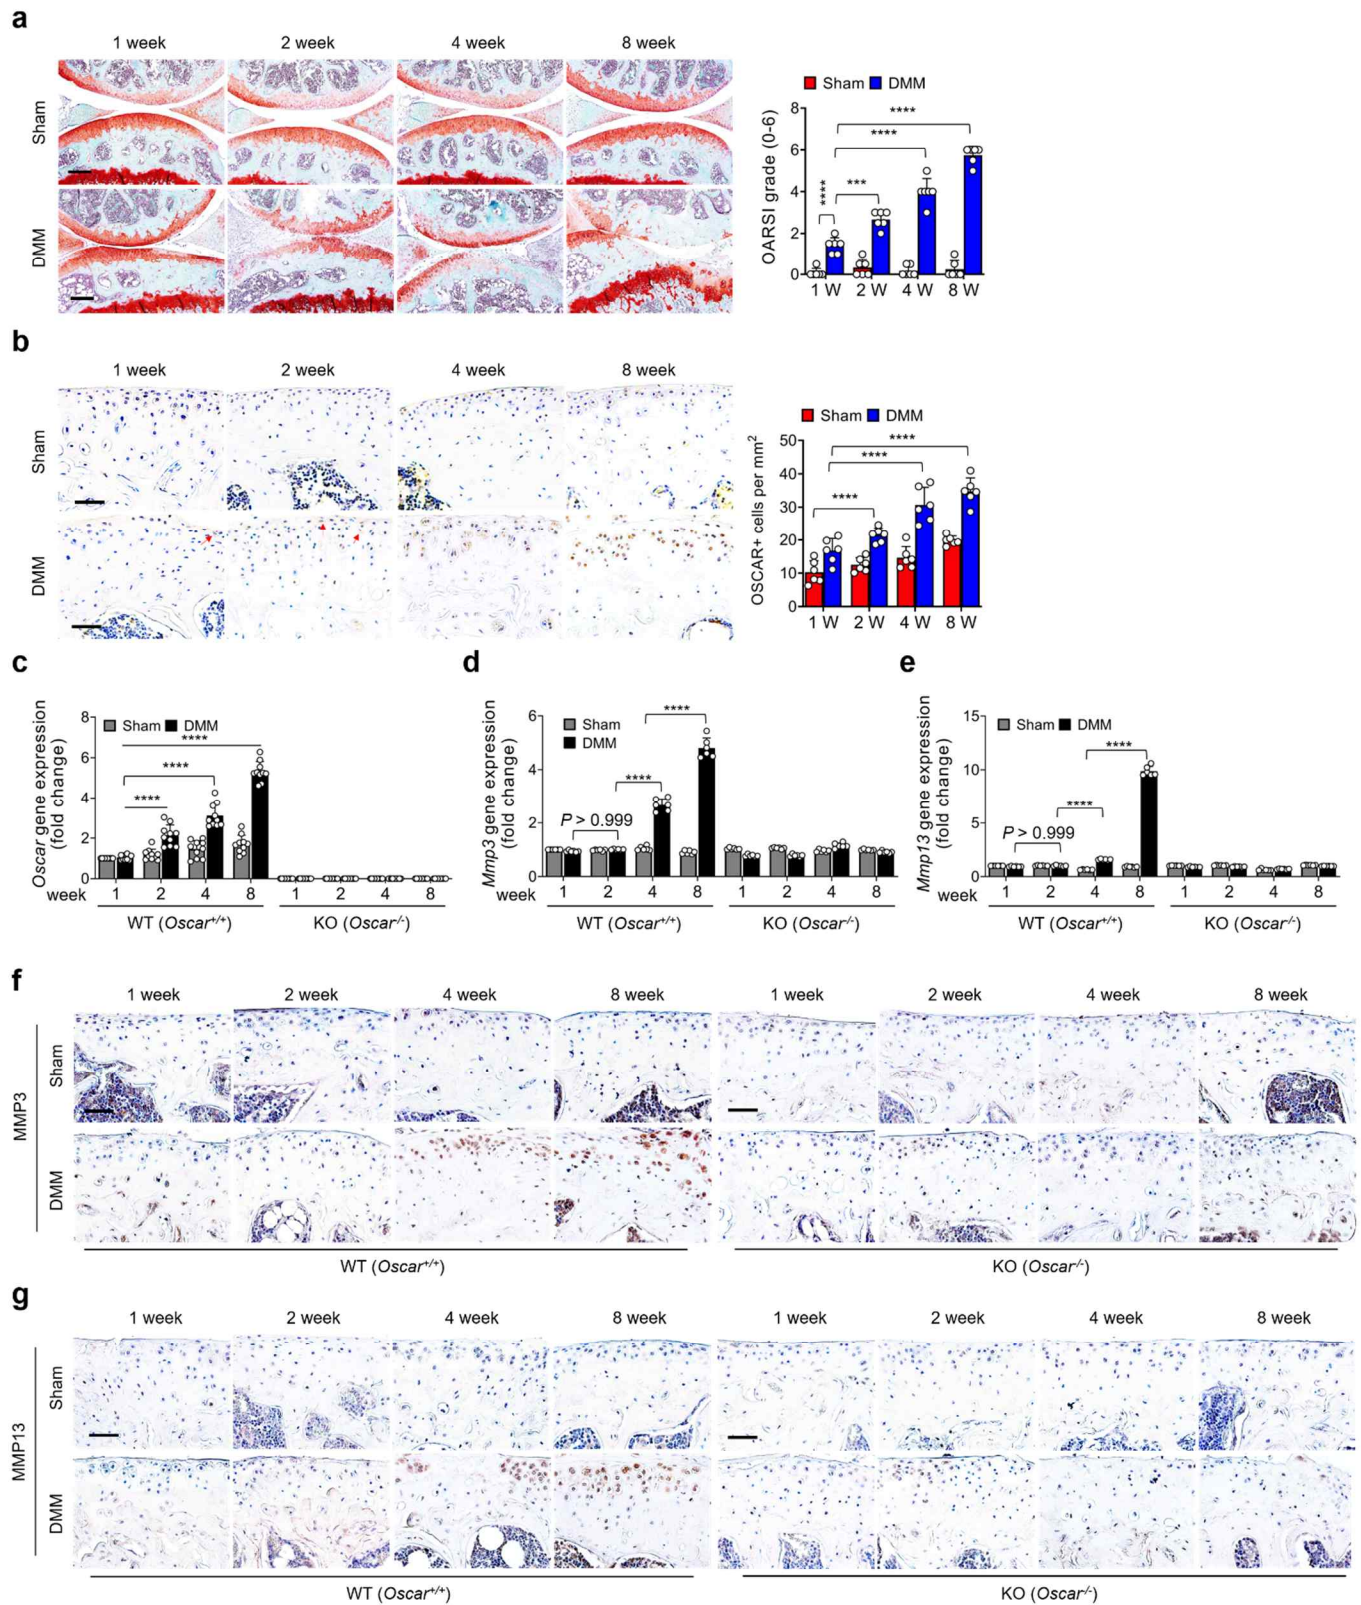

**Supplementary Figure 1. Expression of OSCAR during OA development.** (a) Experimental OA was examined by safranin-O staining and scoring of OA parameters, including articular cartilage destruction (OARS I grade) in WT and *Oscar*<sup>-/-</sup> mice. Bar graphs display mean  $\pm$  S.E.M. for  $n = 6$  mice. *Oscar*<sup>-/-</sup> and WT mice underwent sham or DMM surgery. Scale bar = 200  $\mu$ m. (b) IHC analyses of OSCAR in OA articular cartilage from DMM surgery mice

compared to sham-operated mice (mean  $\pm$  S.E.M. for  $n = 6$ ). Red arrowheads indicate OSCAR-positive cells. Scale bar = 50  $\mu$ m. **(c-e)** qRT-PCR analysis of articular cartilage tissues of WT and *Oscar*<sup>-/-</sup> mice subjected to sham or DMM surgery. Error bars represent mean  $\pm$  S.E.M. of  $n = 10$  mice for *Oscar*,  $n = 6$  for *Mmp3*, and *Mmp13*. **(f, g)** IHC of MMP3 **(f)** and MMP13 **(g)** in OA articular cartilage from DMM surgery mice compared to sham-operated mice ( $n = 6$ ). Scale bar = 50  $\mu$ m. Two-way ANOVA was performed followed by Sidak's Multiple Comparison's test, with p-values indicated in figure. \*\*\* $P = 0.001$ , \*\*\*\* $P < 0.0001$ .

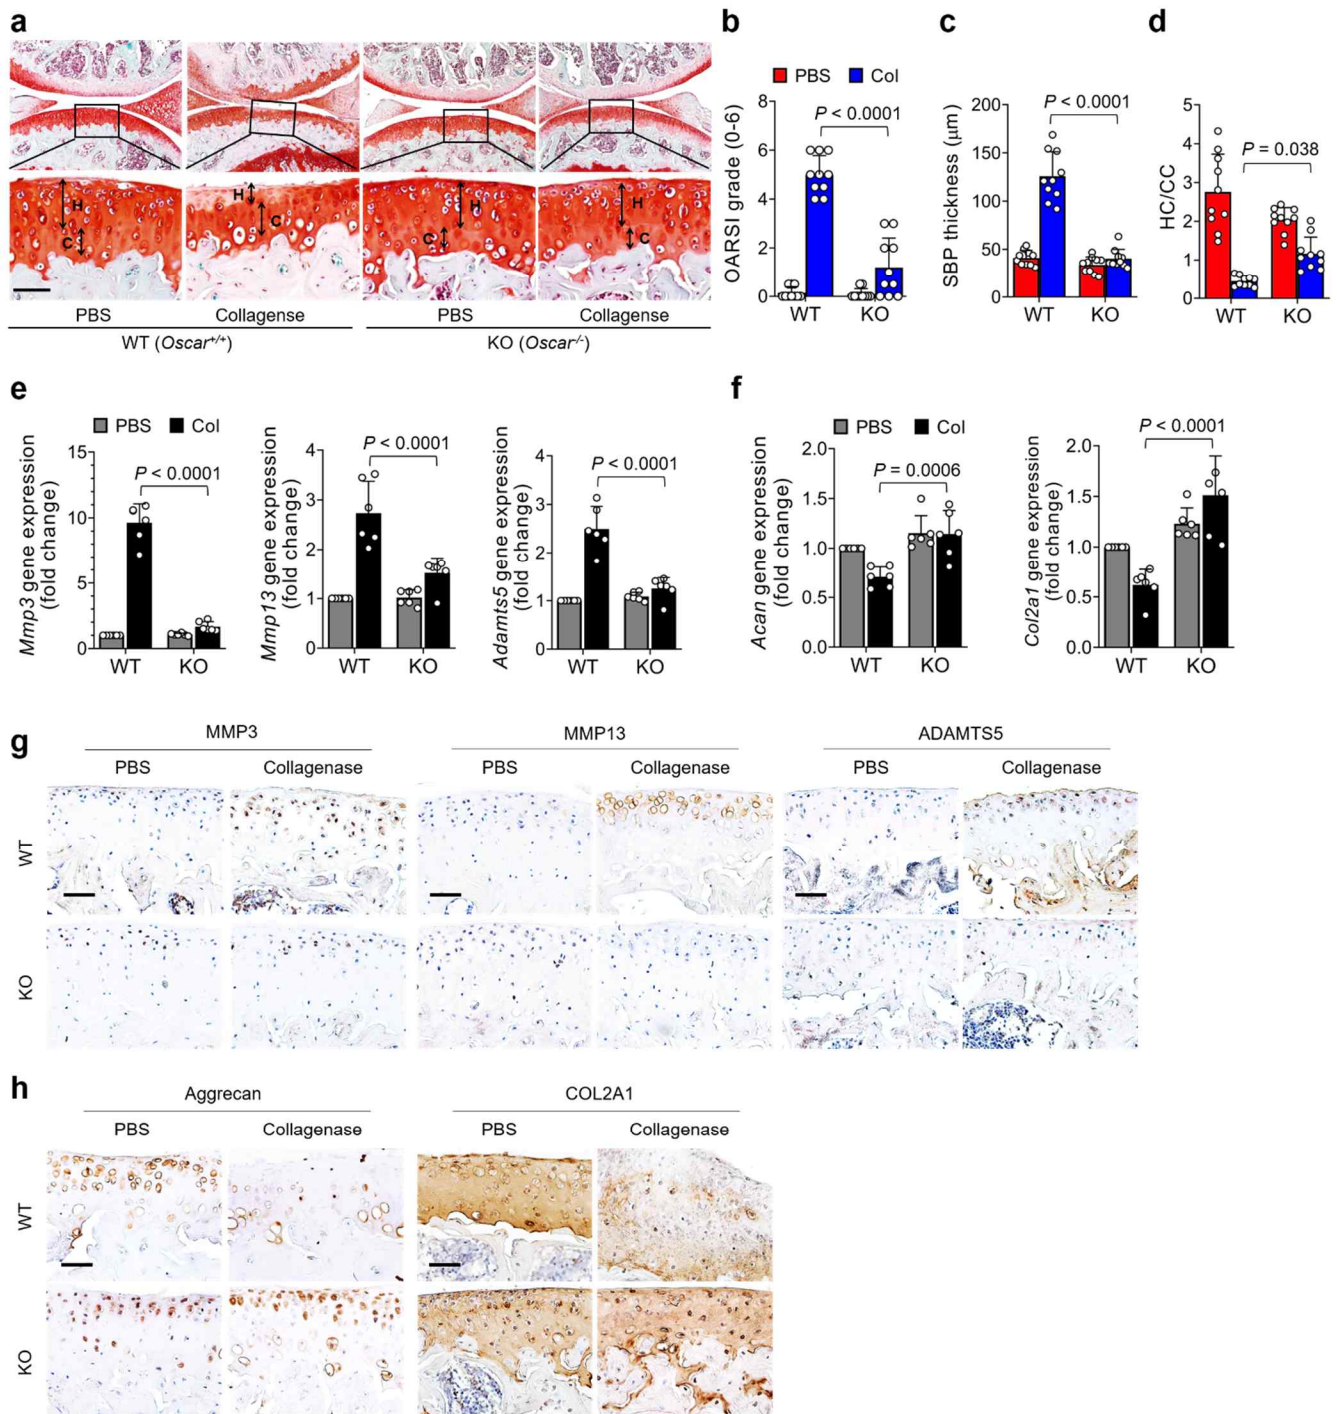

**Supplementary Figure 2. Deletion of OSCAR protects articular cartilage destruction in collagenase-induced OA.** (a-d) Experimental OA was examined by safranin-O staining (a) and scoring of OA parameters, including articular cartilage destruction (OARSI grade) (b), SBP thickness (c), and ratio of hyaline cartilage (HC) and calcified cartilage (CC) (d) in WT and *Oscar<sup>-/-</sup>* mice. *Oscar<sup>-/-</sup>* and WT mice injected with collagenase (Col) or PBS. Scale bar = 50  $\mu$ m. Error bars represent mean  $\pm$  S.E.M. of  $n = 10$  mice (b-d). (e, f) qRT-PCR analysis in articular cartilage tissues of WT and *Oscar<sup>-/-</sup>* mice injected with collagenase or PBS with error bars representing mean  $\pm$  S.E.M. of  $n = 6$ . (g, h) IHC analyses of MMP3, MMP13, and ADAMTS5 (g), aggrecan and COL2A1 (h) in OA articular cartilage from WT and *Oscar<sup>-/-</sup>* mice injected with collagenase or PBS ( $n = 10$ ). Scale bar = 50  $\mu$ m. Two-way ANOVA was performed followed by Sidak's Multiple Comparison's test, with p-values indicated in figure.



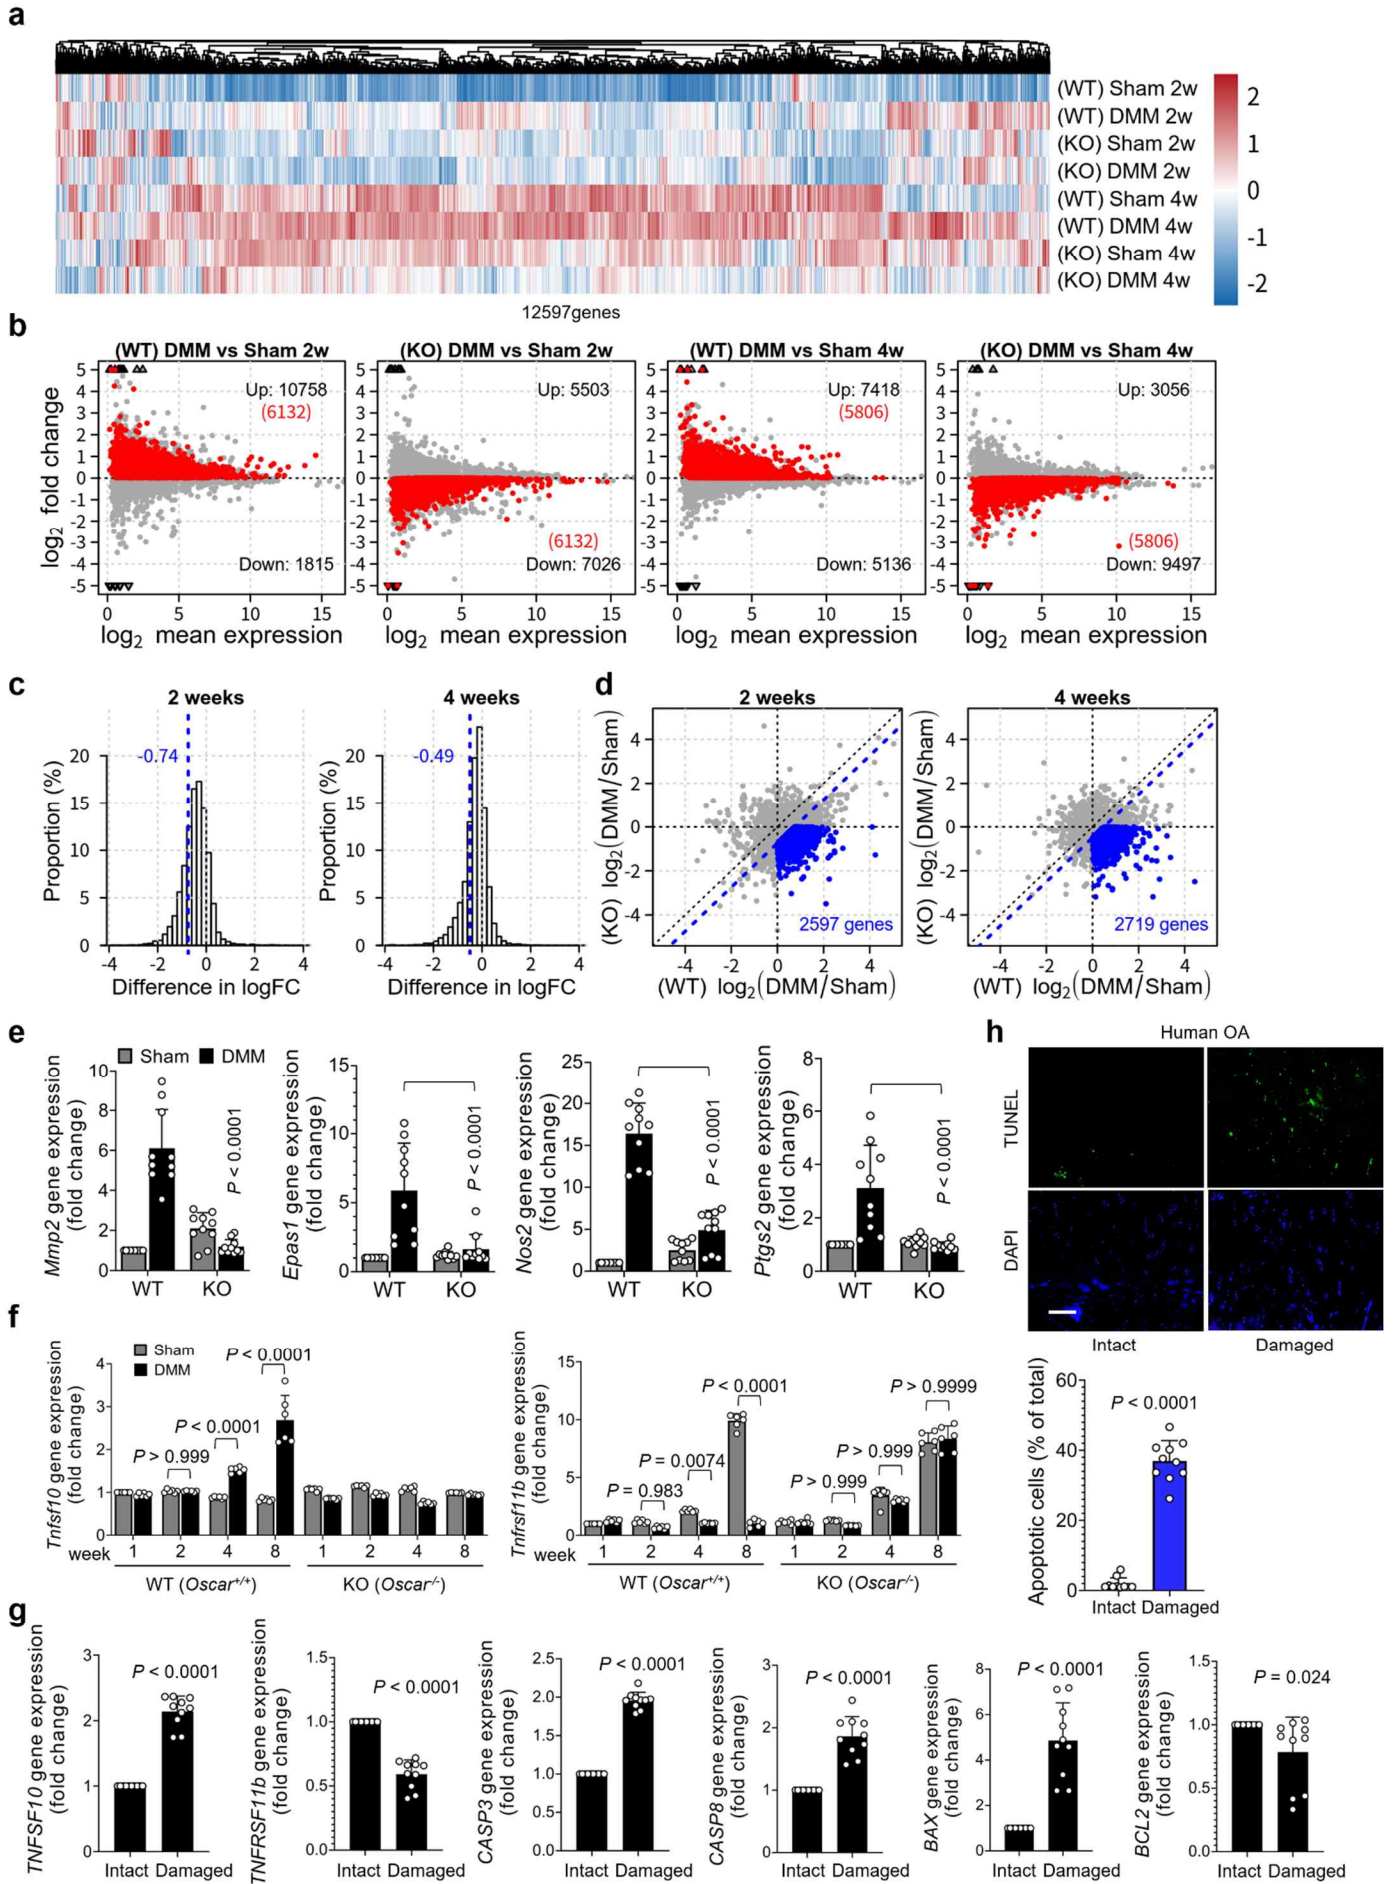

**Supplementary Figure 3. OSCAR regulates apoptotic signaling in OA-induced articular cartilage.** (a) Gene-wise scaled (z-score transformed) gene expression (TPM) values for all genes in each sample ( $n = 10$ ). (b) MA plot showing the gene expression changes between DMM- and sham-operated mice. Each plot (from left to right) shows expression changes in WT and *Oscar*<sup>-/-</sup> mice at 2 and 4 weeks after surgery, respectively. Genes upregulated in WT mice but down-regulated in *Oscar*<sup>-/-</sup> mice at each time point (2 or 4 weeks) are labeled in red. (c) Distribution of 12,597 DIF scores derived from RNA seq data at 2 and 4 weeks, respectively. The lower quartile value (DIF25) is indicated by a blue line. (d) Scatter plot of log<sub>2</sub>-transformed fold-change between DMM- and sham-operated mice (log<sub>2</sub>FC) in WT mice versus *Oscar*<sup>-/-</sup> mice. Genes with a lower DIF score than DIF25 are colored in blue. (e) qRT-PCR analyses of hypoxia and other genes in articular cartilage tissues of WT and *Oscar*<sup>-/-</sup> mice subjected to sham or DMM surgery. Error bars represent mean  $\pm$  S.E.M. of  $n = 10$  mice. (f) qRT-PCR analyses in articular cartilage tissues of WT and *Oscar*<sup>-/-</sup> mice subjected to sham or DMM surgery at time intervals as indicated. Error bars represent mean  $\pm$  S.E.M. of  $n = 6$  mice. (g) qRT-PCR analyses of intact and damaged regions of human OA articular cartilage. Error bars represent mean  $\pm$  S.E.M. of  $n = 10$  patient samples. (h) Apoptotic articular chondrocytes were detected and quantified by TUNEL assay representing mean  $\pm$  S.E.M. of  $n = 10$  patient samples. Scale bar = 200  $\mu$ m. Two-way ANOVA was performed followed by Sidak's Multiple Comparison's test (e, f) and two-tailed student's *t*-test was performed (g, h), with *p*-values indicated in figure.

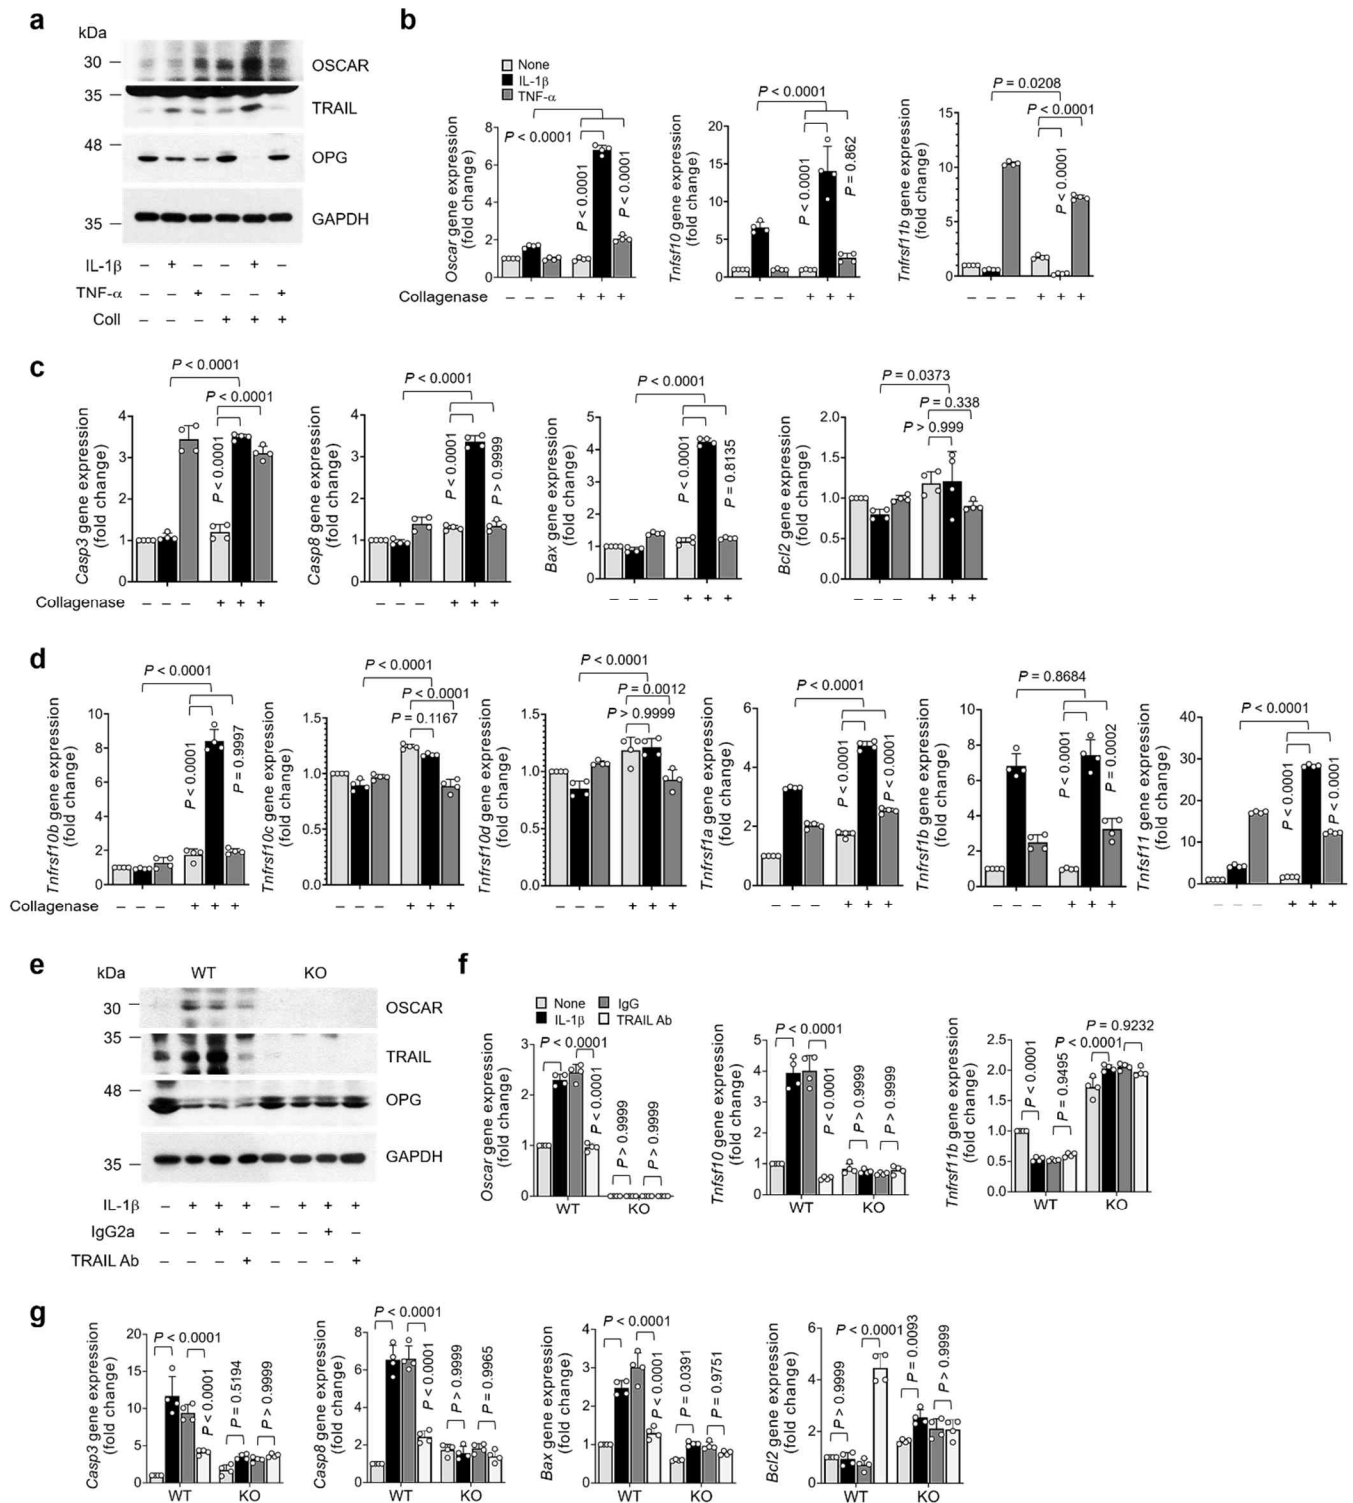

**Supplementary Figure 4. Effects of pro-inflammatory cytokines with collagenase on the expression of apoptosis regulatory genes. (a-e)** Western blot analysis (a) and qRT-PCR analysis (b-d) in mouse articular chondrocytes treated with IL-1 $\beta$  (5 ng mL<sup>-1</sup>) or TNF- $\alpha$  (50 ng mL<sup>-1</sup>) and collagenase (50 U mL<sup>-1</sup>) for 48 h. Error bars represent mean  $\pm$  S.E.M. for  $n = 4$  independent experiments. (e-g) Western blotting (e) and qRT-PCR analysis (f,g) in articular chondrocytes of WT and *Oscar*<sup>-/-</sup> mice treated with TRAIL neutralizing antibody (1  $\mu$ g mL<sup>-1</sup>) before IL-1 $\beta$  treatment. Bar graphs shown in (f, g) are mean  $\pm$  S.E.M. for  $n = 4$  independent experiments. Two-way ANOVA was performed followed by Sidak's Multiple Comparison's test, with  $p$ -values indicated in figure.

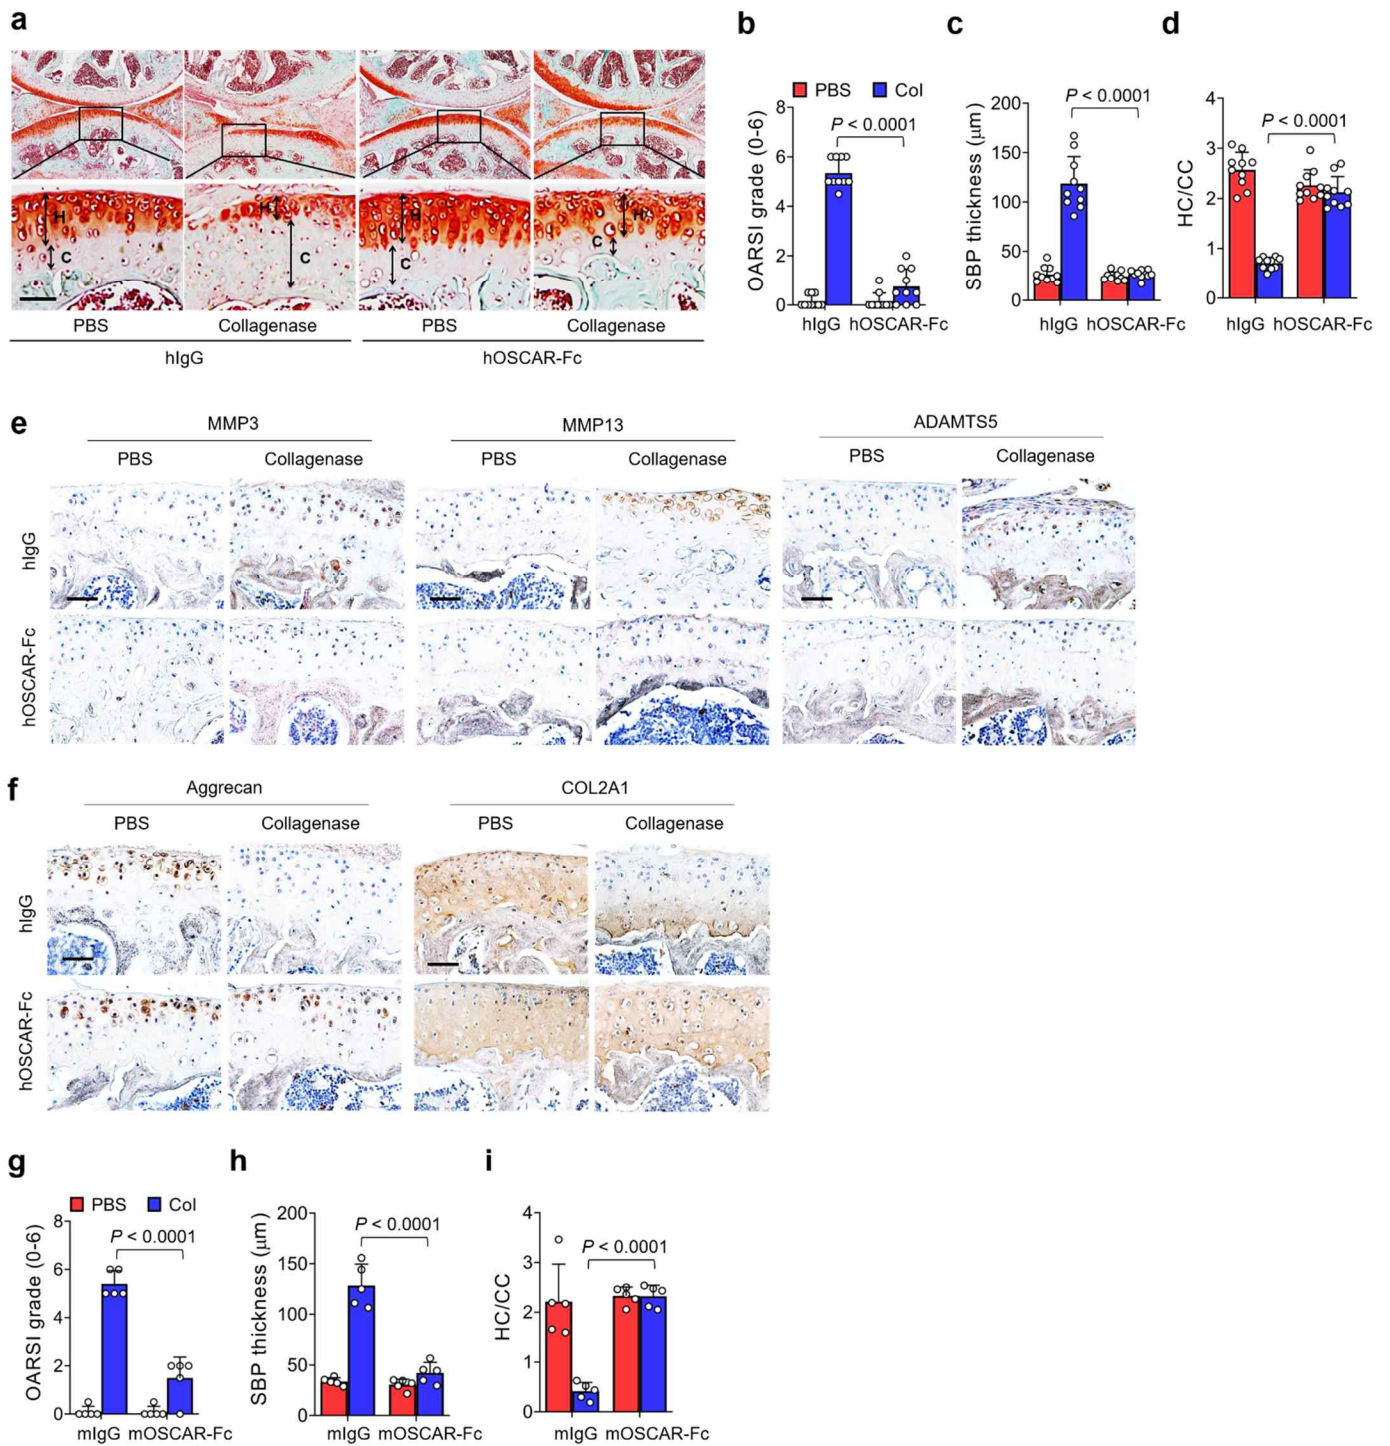

**Supplementary Figure 5. OSCAR-Fc blocks articular cartilage degeneration in mice with induced OA.** (a–d) WT mice injected with PBS or collagenase (Col) were IA-injected with human IgG as a control or hOSCAR-Fc ( $2 \text{ mg kg}^{-1}$ ) to block OSCAR in joint tissues. Articular cartilage sections were subjected to safranin-O staining (a) and quantitative analysis of OARS1 grade (b), SBP thickness (c), and ratio of hyaline cartilage (HC) and calcified cartilage (CC) calculated (d). Scale bar =  $50 \mu\text{m}$ . Error bars represent mean  $\pm$  S.E.M. of  $n = 10$  mice (b–d). (e, f) IHC analyses of MMP3, MMP13, and ADAMTS5 (e), aggrecan and COL2A1 (f) in OA articular cartilage from WT mice injected with collagenase or PBS ( $n = 10$ ). Scale bar =  $50 \mu\text{m}$ . (g–i) WT mice injected with collagenase (Col) or PBS were IA-injected with mouse IgG as a control or mOSCAR-Fc ( $2 \text{ mg kg}^{-1}$ ) to block OSCAR in joint tissues. Articular cartilage sections were subjected to quantitative analysis of OARS1 grade (g), SBP (SBP Th) thickness (h), and ratio of hyaline cartilage (HC) and calcified cartilage (CC) (i). Error bars represent mean  $\pm$  S.E.M. of  $n = 5$  mice (g–i). Two-way ANOVA was performed followed by Sidak’s Multiple Comparison’s test, with  $p$ -values indicated in figure.



**Supplementary Table1. *Oscar* siRNA sequences.**

| Gene             | Strand    | Primer sequence                 |
|------------------|-----------|---------------------------------|
| <i>siOscar a</i> | Sense     | 5'-CCUACUGUUGCUAUUACCAUU-3'     |
|                  | Antisense | 5'-UGGUAAUAGCAACAGUAGGUU-3'     |
| <i>siOscar b</i> | Sense     | 5'-CUAAUGUUAGUGACUUUAUUU-3'     |
|                  | Antisense | 5'-AUAAAGUCACUAACAUUAGUU-3'     |
| <i>siOscar c</i> | Sense     | 5'-CUUUAUCCUCCCUUGAAAAUU-3'     |
|                  | Antisense | 5'-UUUUCAAGGGAGGAUAAAGUU-3'     |
| Control siRNA    | Sense     | 5'-CCUCGUGCCGUUCCAUCAGGUAGUU-3' |
|                  | Antisense | 5'-CUACCUGAUGGAACGGCACGAGGUU-3' |

**Supplementary Table2. Oligonucleotides used for real time PCR analysis.**

| Gene             | Strand    | Primer sequence                   | Origin |
|------------------|-----------|-----------------------------------|--------|
| <i>Oscar</i>     | Sense     | 5'-AGGGAAACCTCATCCGTTT-3'         | Mouse  |
|                  | Antisense | 5'-TGCTGTGCCAATCACAAGTA-3'        |        |
| <i>OSCAR</i>     | Sense     | 5'-GCTTCATACCACCCTAAGCC-3'        | Human  |
|                  | Antisense | 5'-AAAGTCCAAATCTCCAAGCG-3'        |        |
| <i>Mmp3</i>      | Sense     | 5'-TCCTGATGTTGGTGGCTTCAG-3'       | Mouse  |
|                  | Antisense | 5'-TGTCTTGCCAAATCCGGTGTA-3'       |        |
| <i>Mmp13</i>     | Sense     | 5'-CCTTGAACGTCATCATCAGG-3'        | Mouse  |
|                  | Antisense | 5'-TGTTTATTGTTGCTGCCCAT-3'        |        |
| <i>Adamts5</i>   | Sense     | 5'-GCCATTGTAATAACCCTGCACC-3'      | Mouse  |
|                  | Antisense | 5'-TCAGTCCCATCCGTAACCTTTG-3'      |        |
| <i>Acan</i>      | Sense     | 5'-GAAGACGACATCACCATCCAG-3'       | Mouse  |
|                  | Antisense | 5'-CTGTCTTTGTACCCACACATG-3'       |        |
| <i>Col2a1</i>    | Sense     | 5'-CACACTGGTAAGTGGGGCAAGA-3'      | Mouse  |
|                  | Antisense | 5'-GGATTGTGTTGTTTCAGGGTTCG-3'     |        |
| <i>Tnfsf10</i>   | Sense     | 5'-CCTCTCGGAAAGGGCATTTC-3'        | Mouse  |
|                  | Antisense | 5'-TCCTGCTCGATGACCAGCT-3'         |        |
| <i>TNFSF10</i>   | Sense     | 5'-GAGTATGAACAGCCCCT-3'           | Human  |
|                  | Antisense | 5'-GTTGCTTCTTCTCTGGT-3'           |        |
| <i>Tnfrsf11b</i> | Sense     | 5'-CAGAGCGAAACACAGTTTG-3'         | Mouse  |
|                  | Antisense | 5'-CACACAGGGTGACATCTATTC-3'       |        |
| <i>TNFRSF11B</i> | Sense     | 5'-TCCTGGATTTGGAGTGGTGC-3'        | Human  |
|                  | Antisense | 5'-AGCAGGAGACCAAAGACACT-3'        |        |
| <i>Mmp2</i>      | Sense     | 5'-CCAACACTACGATGATGAC-3'         | Mouse  |
|                  | Antisense | 5'-ACCAGTGTCAGTATCAG-3'           |        |
| <i>Epas1</i>     | Sense     | 5'-CGAGAAGAACGACGTGGTGTTC-3'      | Mouse  |
|                  | Antisense | 5'-GTGAAGGCGGGCAGGCTCC-3'         |        |
| <i>Nos2</i>      | Sense     | 5'-ACCTTGTTTCAGCTACGCCTT-3'       | Mouse  |
|                  | Antisense | 5'-CATTCCCAAATGTGCTTGTC-3'        |        |
| <i>Ptgs2</i>     | Sense     | 5'-CTCAATGAGTACCGCAAACG-3'        | Mouse  |
|                  | Antisense | 5'-TTCAATTCTGCAGCCATTTC-3'        |        |
| <i>Casp3</i>     | Sense     | 5'-GATCTTACTCGTGAAGACATTTTGGAA-3' | Mouse  |
|                  | Antisense | 5'-CTTCATCACCATGGCTTAGAATCAC-3'   |        |
| <i>CASP3</i>     | Sense     | 5'-GAGCTGCCTGTAACCTTG-3'          | Human  |
|                  | Antisense | 5'-ACCTTTAGAACATTTCCACT-3'        |        |
| <i>Casp8</i>     | Sense     | 5'-CTGGTCAACTTCCTAGACTGCAA-3'     | Mouse  |
|                  | Antisense | 5'-ATCTCAATTCCAACCTCGCTCACT-3'    |        |
| <i>CASP8</i>     | Sense     | 5'-AGAGTCTGTGCCCAAATCAAC-3'       | Human  |
|                  | Antisense | 5'-GCTGCTTCTCTTTGCTGAA-3'         |        |
| <i>Bax</i>       | Sense     | 5'-GAACAGATCATGAAGACAGGG-3'       | Mouse  |
|                  | Antisense | 5'-CAGTTCATCTCCAATTCGCC-3'        |        |

|                  |                    |                                                                    |       |
|------------------|--------------------|--------------------------------------------------------------------|-------|
| <i>BAX</i>       | Sense<br>Antisense | 5'-CCCGAGAGGTCTTTTTCCGAG-3'<br>5'-CCAGCCCATGATGGTTCTGAT-3'         | Human |
| <i>Bcl2</i>      | Sense<br>Antisense | 5'-TGTGGATGACTGAGTACCTGAAC-3'<br>5'-GAGAAATCAAACAGAGGTCGCATG-3'    | Mouse |
| <i>BCL2</i>      | Sense<br>Antisense | 5'-ACGAGTGGGATGGGGGAGATGTG-3'<br>5'-GCGGTAGCGGCGGGAGAAAGTC-3'      | Human |
| <i>Tnfrsf10b</i> | Sense<br>Antisense | 5'-TTGGAATGGCTGGTGTAGTC-3'<br>5'-TGCTGCTTGCTGTGCTAC-3'             | Mouse |
| <i>Tnfrsf10c</i> | Sense<br>Antisense | 5'-TTTCCGGAATCATGCCGCCCA-3'<br>5'-AGGACCAGCCAGTTTCTGGGATTTG-3'     | Mouse |
| <i>Tnfrsf10d</i> | Sense<br>Antisense | 5'-TGGCTTCTTCTGCAGCTTGGTGT-3'<br>5'-GGGATTTTCGCAGGGCGCCTT-3'       | Mouse |
| <i>Tnfrsf1a</i>  | Sense<br>Antisense | 5'-GGGCACCTTTACGGCTTCC-3'<br>5'-GGTTCTCCTTACAGCCACACA-3'           | Mouse |
| <i>Tnfrsf1b</i>  | Sense<br>Antisense | 5'-GTCGCGCTGGTCTTCGAACTG-3'<br>5'-GGTATACATGCTTGCCTCACAGTC-3'      | Mouse |
| <i>Tnfsf11</i>   | Sense<br>Antisense | 5'-ATCGGGAAGCGTACCTACAG-3'<br>5'-GTGCTCCCTCCTTTCATCAG-3'           | Mouse |
| <i>β-Actin</i>   | Sense<br>Antisense | 5'-TGGAATCCTGTGGCATCCATGAAAC-3'<br>5'-TAAAACGCAGCTCAGTAACAGTCCG-3' | Mouse |
| <i>β-ACTIN</i>   | Sense<br>Antisense | 5'-GCCGGGACCTGACTGACTAC-3'<br>5'-TTCTCCTTAATGTCACGCACGAT-3'        | Human |
